# Supplementary material for: Clumps of Mesenchymal Stem Cells/Extracellular Matrix Complexes Generated with Xeno-Free Chondro-Inductive Medium Induce Bone Regeneration via Endochondral Ossification
Source: MDPI journal article supplement (doi:10.3390/biomedicines9101408), 2021-10-07
Supplement: s1 [file s1]

**Supplementary Table S1. Sense and antisense primers for real-time PCR**

| <i>Target gene</i> |         | <i>Primer sequence</i>           |
|--------------------|---------|----------------------------------|
| Sox9               | Forward | 5'- CATGAGCGAGGTGCACTCC -3'      |
|                    | Reverse | 5'- TCGCTTCAGGTCAGCCTTG -3'      |
| ACAN               | Forward | 5'- TGAGGAGGGCTGGAACAAGTACC -3'  |
|                    | Reverse | 5'- GGAGGTGGTAATTGCAGGGAACA -3'  |
| COL2A1             | Forward | 5'- TTTCCCAGGTCAAGATGGTC -3'     |
|                    | Reverse | 5'- CTTCAGCACCTGTCTCACCA -3'     |
| COL10A1            | Forward | 5'- CCCTTTTTGCTGCTAGTATCC -3'    |
|                    | Reverse | 5'- CTGTTGTCCAGGTTTTCCTGGCAC -3' |
| IHH                | Forward | 5'- AACTCGCTGGCTATCTCGGT -3'     |
|                    | Reverse | 5'- GCCCTCATAATGCAGGGACT -3'     |
| 18S                | Forward | 5'- GTAACCCGTTGAACCCCAT -3'      |
|                    | Reverse | 5'- CCATCCAATCGGTAGTAGCG -3'     |
