# Supplementary material for: Clumps of Mesenchymal Stem Cells/Extracellular Matrix Complexes Generated with Xeno-Free Chondro-Inductive Medium Induce Bone Regeneration via Endochondral Ossification
Source: Biomedicines. 2021 Oct 7;9(10):1408. doi: 10.3390/biomedicines9101408 (PMC8533314; doi:10.3390/biomedicines9101408)
Supplement: Supplementary file 1 [file biomedicines-09-01408-s001.zip]

Archive with 4 entries (4 files):
- supplementary figure S1.pdf
- supplementary figure S2.pdf
- supplementary figure S3.pdf
- supplementary table S1.pdf
